# Supplementary material for: Auditory brainstem responses in the nine-banded armadillo (Dasypus novemcinctus)
Source: PeerJ journal article supplement (doi:10.7717/peerj.16602), 2023-12-13

## General Linear Model

[DataSet3]

### Warnings

Box's Test of Equality of Covariance Matrices is not computed because there are fewer than two nonsingular cell covariance matrices.

### Within-Subjects Factors

Measure: Thresh

| Freq | Dependent Variable |
|------|--------------------|
| 1    | @4KHz              |
| 2    | @8kHz              |
| 3    | @12kHz             |
| 4    | @16kHz             |
| 5    | @20kHz             |

### Between-Subjects Factors

|     |      | N |
|-----|------|---|
| Sex | 1.00 | 5 |
|     | 2.00 | 3 |

### Descriptive Statistics

|        | Sex   | Mean    | Std. Deviation | N |
|--------|-------|---------|----------------|---|
| 4 kHz  | 1.00  | 39.2000 | 8.21584        | 5 |
|        | 2.00  | 34.3667 | 5.77350        | 3 |
|        | Total | 37.3875 | 7.37243        | 8 |
| 8 kHz  | 1.00  | 21.4800 | 11.51790       | 5 |
|        | 2.00  | 34.3000 | 10.00000       | 3 |
|        | Total | 26.2875 | 12.18201       | 8 |
| 12 kHz | 1.00  | 21.2000 | 12.32376       | 5 |
|        | 2.00  | 35.5333 | 15.27525       | 3 |
|        | Total | 26.5750 | 14.43891       | 8 |
| 16 kHz | 1.00  | 29.4000 | 16.11521       | 5 |
|        | 2.00  | 36.4333 | 5.77350        | 3 |
|        | Total | 32.0375 | 13.08335       | 8 |
| 20 kHz | 1.00  | 36.3000 | 13.03840       | 5 |
|        | 2.00  | 46.8000 | 10.00000       | 3 |
|        | Total | 40.2375 | 12.45976       | 8 |

### Multivariate Tests<sup>a</sup>

| Effect     |                    | Value | F                  | Hypothesis df | Error df | Sig. |
|------------|--------------------|-------|--------------------|---------------|----------|------|
| Freq       | Pillai's Trace     | .777  | 2.617 <sup>b</sup> | 4.000         | 3.000    | .228 |
|            | Wilks' Lambda      | .223  | 2.617 <sup>b</sup> | 4.000         | 3.000    | .228 |
|            | Hotelling's Trace  | 3.489 | 2.617 <sup>b</sup> | 4.000         | 3.000    | .228 |
|            | Roy's Largest Root | 3.489 | 2.617 <sup>b</sup> | 4.000         | 3.000    | .228 |
| Freq * Sex | Pillai's Trace     | .806  | 3.125 <sup>b</sup> | 4.000         | 3.000    | .188 |
|            | Wilks' Lambda      | .194  | 3.125 <sup>b</sup> | 4.000         | 3.000    | .188 |
|            | Hotelling's Trace  | 4.167 | 3.125 <sup>b</sup> | 4.000         | 3.000    | .188 |
|            | Roy's Largest Root | 4.167 | 3.125 <sup>b</sup> | 4.000         | 3.000    | .188 |

### Multivariate Tests<sup>a</sup>

| Effect     |                    | Partial Eta Squared | Noncent. Parameter | Observed Power <sup>c</sup> |
|------------|--------------------|---------------------|--------------------|-----------------------------|
| Freq       | Pillai's Trace     | .777                | 10.468             | .241                        |
|            | Wilks' Lambda      | .777                | 10.468             | .241                        |
|            | Hotelling's Trace  | .777                | 10.468             | .241                        |
|            | Roy's Largest Root | .777                | 10.468             | .241                        |
| Freq * Sex | Pillai's Trace     | .806                | 12.500             | .279                        |
|            | Wilks' Lambda      | .806                | 12.500             | .279                        |
|            | Hotelling's Trace  | .806                | 12.500             | .279                        |
|            | Roy's Largest Root | .806                | 12.500             | .279                        |

- a. Design: Intercept + Sex  
Within Subjects Design: Freq
- b. Exact statistic
- c. Computed using alpha = .05

### Mauchly's Test of Sphericity<sup>a</sup>

Measure: Thresh

| Within Subjects Effect | Mauchly's W | Approx. Chi-Square | df | Sig. | Epsilon <sup>b</sup><br>Greenhouse-Geisser |
|------------------------|-------------|--------------------|----|------|--------------------------------------------|
| Freq                   | .067        | 11.909             | 9  | .249 | .612                                       |

### Mauchly's Test of Sphericity<sup>a</sup>

Measure: Thresh

| Within Subjects Effect | Epsilon <sup>b</sup> |             |
|------------------------|----------------------|-------------|
|                        | Huynh-Feldt          | Lower-bound |
| Freq                   | 1.000                | .250        |

Tests the null hypothesis that the error covariance matrix of the orthonormalized transformed dependent variables is proportional to an identity matrix.

- a. Design: Intercept + Sex  
Within Subjects Design: Freq
- b. May be used to adjust the degrees of freedom for the averaged tests of significance. Corrected tests are displayed in the Tests of Within-Subjects Effects table.

### Tests of Within-Subjects Effects

Measure: Thresh

| Source      |                    | Type III Sum of Squares | df     | Mean Square | F     | Sig. |
|-------------|--------------------|-------------------------|--------|-------------|-------|------|
| Freq        | Sphericity Assumed | 1003.097                | 4      | 250.774     | 3.893 | .014 |
|             | Greenhouse-Geisser | 1003.097                | 2.450  | 409.453     | 3.893 | .037 |
|             | Huynh-Feldt        | 1003.097                | 4.000  | 250.774     | 3.893 | .014 |
|             | Lower-bound        | 1003.097                | 1.000  | 1003.097    | 3.893 | .096 |
| Freq * Sex  | Sphericity Assumed | 441.034                 | 4      | 110.258     | 1.712 | .180 |
|             | Greenhouse-Geisser | 441.034                 | 2.450  | 180.025     | 1.712 | .212 |
|             | Huynh-Feldt        | 441.034                 | 4.000  | 110.258     | 1.712 | .180 |
|             | Lower-bound        | 441.034                 | 1.000  | 441.034     | 1.712 | .239 |
| Error(Freq) | Sphericity Assumed | 1545.993                | 24     | 64.416      |       |      |
|             | Greenhouse-Geisser | 1545.993                | 14.699 | 105.176     |       |      |
|             | Huynh-Feldt        | 1545.993                | 24.000 | 64.416      |       |      |
|             | Lower-bound        | 1545.993                | 6.000  | 257.666     |       |      |

### Tests of Within-Subjects Effects

Measure: Thresh

| Source      |                    | Partial Eta Squared | Noncent. Parameter | Observed Power <sup>a</sup> |
|-------------|--------------------|---------------------|--------------------|-----------------------------|
| Freq        | Sphericity Assumed | .394                | 15.572             | .830                        |
|             | Greenhouse-Geisser | .394                | 9.537              | .658                        |
|             | Huynh-Feldt        | .394                | 15.572             | .830                        |
|             | Lower-bound        | .394                | 3.893              | .383                        |
| Freq * Sex  | Sphericity Assumed | .222                | 6.847              | .445                        |
|             | Greenhouse-Geisser | .222                | 4.193              | .328                        |
|             | Huynh-Feldt        | .222                | 6.847              | .445                        |
|             | Lower-bound        | .222                | 1.712              | .198                        |
| Error(Freq) | Sphericity Assumed |                     |                    |                             |
|             | Greenhouse-Geisser |                     |                    |                             |
|             | Huynh-Feldt        |                     |                    |                             |
|             | Lower-bound        |                     |                    |                             |

a. Computed using alpha = .05

### Tests of Within-Subjects Contrasts

Measure: Thresh

| Source      | Freq      | Type III Sum of Squares | df | Mean Square | F     | Sig. |
|-------------|-----------|-------------------------|----|-------------|-------|------|
| Freq        | Linear    | 158.995                 | 1  | 158.995     | 2.318 | .179 |
|             | Quadratic | 820.123                 | 1  | 820.123     | 9.177 | .023 |
|             | Cubic     | 20.962                  | 1  | 20.962      | .282  | .615 |
|             | Order 4   | 3.017                   | 1  | 3.017       | .119  | .742 |
| Freq * Sex  | Linear    | 116.065                 | 1  | 116.065     | 1.692 | .241 |
|             | Quadratic | 185.203                 | 1  | 185.203     | 2.072 | .200 |
|             | Cubic     | 135.744                 | 1  | 135.744     | 1.825 | .225 |
|             | Order 4   | 4.022                   | 1  | 4.022       | .159  | .704 |
| Error(Freq) | Linear    | 411.509                 | 6  | 68.585      |       |      |
|             | Quadratic | 536.177                 | 6  | 89.363      |       |      |
|             | Cubic     | 446.302                 | 6  | 74.384      |       |      |
|             | Order 4   | 152.006                 | 6  | 25.334      |       |      |

### Tests of Within-Subjects Contrasts

Measure: Thresh

| Source      | Freq      | Partial Eta Squared | Noncent. Parameter | Observed Power <sup>a</sup> |
|-------------|-----------|---------------------|--------------------|-----------------------------|
| Freq        | Linear    | .279                | 2.318              | .251                        |
|             | Quadratic | .605                | 9.177              | .715                        |
|             | Cubic     | .045                | .282               | .074                        |
|             | Order 4   | .019                | .119               | .060                        |
| Freq * Sex  | Linear    | .220                | 1.692              | .196                        |
|             | Quadratic | .257                | 2.072              | .230                        |
|             | Cubic     | .233                | 1.825              | .208                        |
|             | Order 4   | .026                | .159               | .063                        |
| Error(Freq) | Linear    |                     |                    |                             |
|             | Quadratic |                     |                    |                             |
|             | Cubic     |                     |                    |                             |
|             | Order 4   |                     |                    |                             |

a. Computed using alpha = .05

### Levene's Test of Equality of Error Variances<sup>a</sup>

|        |                                      | Levene Statistic | df1 | df2   | Sig. |
|--------|--------------------------------------|------------------|-----|-------|------|
| 4 kHz  | Based on Mean                        | .078             | 1   | 6     | .789 |
|        | Based on Median                      | .062             | 1   | 6     | .812 |
|        | Based on Median and with adjusted df | .062             | 1   | 5.895 | .812 |
|        | Based on trimmed mean                | .060             | 1   | 6     | .815 |
| 8 kHz  | Based on Mean                        | .057             | 1   | 6     | .819 |
|        | Based on Median                      | .006             | 1   | 6     | .941 |
|        | Based on Median and with adjusted df | .006             | 1   | 5.208 | .941 |
|        | Based on trimmed mean                | .030             | 1   | 6     | .868 |
| 12 kHz | Based on Mean                        | .051             | 1   | 6     | .829 |
|        | Based on Median                      | .007             | 1   | 6     | .937 |
|        | Based on Median and with adjusted df | .007             | 1   | 5.477 | .938 |
|        | Based on trimmed mean                | .048             | 1   | 6     | .834 |
| 16 kHz | Based on Mean                        | 2.019            | 1   | 6     | .205 |
|        | Based on Median                      | 1.561            | 1   | 6     | .258 |
|        | Based on Median and with adjusted df | 1.561            | 1   | 5.126 | .266 |
|        | Based on trimmed mean                | 2.146            | 1   | 6     | .193 |
| 20 kHz | Based on Mean                        | .762             | 1   | 6     | .416 |
|        | Based on Median                      | .104             | 1   | 6     | .758 |
|        | Based on Median and with adjusted df | .104             | 1   | 4.929 | .760 |
|        | Based on trimmed mean                | .666             | 1   | 6     | .446 |

Tests the null hypothesis that the error variance of the dependent variable is equal across groups.

- a. Design: Intercept + Sex  
 Within Subjects Design: Freq

### Tests of Between-Subjects Effects

Measure: Thresh

Transformed Variable: Average

| Source    | Type III Sum of Squares | df | Mean Square | F      | Sig. | Partial Eta Squared |
|-----------|-------------------------|----|-------------|--------|------|---------------------|
| Intercept | 42087.725               | 1  | 42087.725   | 97.842 | .000 | .942                |
| Sex       | 595.608                 | 1  | 595.608     | 1.385  | .284 | .188                |
| Error     | 2580.955                | 6  | 430.159     |        |      |                     |

### Tests of Between-Subjects Effects

Measure: Thresh

Transformed Variable: Average

| Source    | Noncent. Parameter | Observed Power <sup>a</sup> |
|-----------|--------------------|-----------------------------|
| Intercept | 97.842             | 1.000                       |
| Sex       | 1.385              | .169                        |
| Error     |                    |                             |

a. Computed using alpha = .05

### Profile Plots

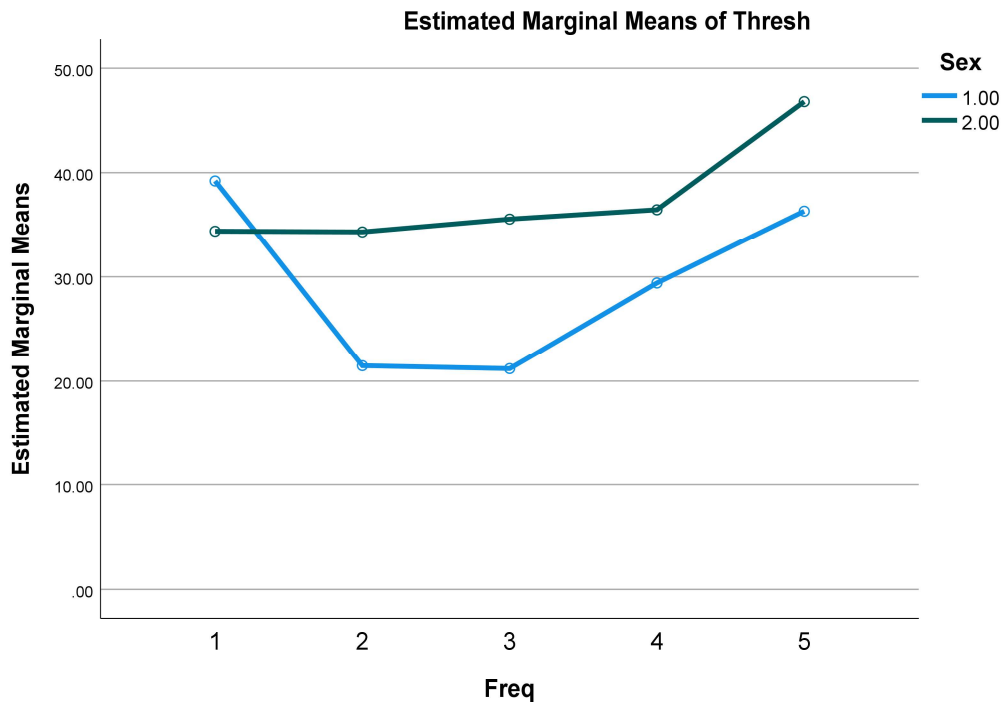

Supplement: Sex_ABR_Analysis_JP.pdf [file Sex_ABR_Analysis_JP.pdf]
